# Supplementary material for: An in-silico quality assurance study of contouring target volumes in thoracic tumors within a cooperative group setting
Source: PubMed Central journal article supplement — Clin Transl Radiat Oncol. 2019 Jan 6;15:83–92. doi: 10.1016/j.ctro.2019.01.001 (PMC6365802; doi:10.1016/j.ctro.2019.01.001), 2019-01-06
Supplement: mmc1.pdf [file mmc1.pdf]

# 1. SWOG Lung Target Delineation Study

SWOG Radiation Therapy Committee In Silico Trial to Reduce Uncertainty in Contouring Thoracic Targets Through Instruction Optimization (SWOG RT INSTRUCTION).

Thanks for completing your target delineation session! At this time, please take 5-10 minutes to complete the following questions.

**\*1. Please enter today's date in MM/DD/YYYY format.**

\_\_\_\_\_

**\*2. Which case number did you just complete:**

\_\_\_\_\_

**\*3. Please enter your email address:**

\_\_\_\_\_

**\*4. Please describe your position/level of expertise (choose 1 column only)**

Resident/Trainee

Attending physician

Practicing clinical Radiation Oncologist

**\*5. Please estimate the amount of time you spent on the contouring task alone for this session (in minutes).**

\_\_\_\_\_

## 2.

**6. Please select the frequency you contour cases from this anatomical site:**

Weekly

Monthly

Annually/Rarely

I typically contour cases in this anatomic region:

**7. How confident are you in your expertise in contouring cases in the anatomical region of this case?**

I am:

Expert

Intermediate

Novice

**8. On a scale of 1-5, please indicate how the relative difficulty of the contouring session you just completed.**

Compared to other cases I have contoured in the past the case just contoured was:

1-Easy

2-Somewhat easy

3-Average

4-Somewhat Difficult

5-Difficult

**9. Please indicate how confident you are that the contours you created for the submitted case are correct.**

Not confident      Somewhat confident      Confident      Very confident

Regarding the submitted contours I am:

Please comment why you are or are not confident in the quality of the contours (optional):

\_\_\_\_\_

**10. How clear were the directions for contouring this case?**

Very clear and understood

Clear

Somewhat clear

Unclear

Uninterpretable

How might the directions have been improved? (Optional):

\_\_\_\_\_

**3.**

**\*11. Please indicate what treatment planning system was used for physician contouring:**

\_\_\_\_\_

**\*12. Please indicate what system was used for PET-CT registration:**

\_\_\_\_\_

**\*13. Please indicate what software was used for 4DCT analysis:**

\_\_\_\_\_

Thanks for completing this survey!! Your time and assistance are critical to this project, and we are thankful for your contribution.

You have just completed Phase I of the SWOG Lung Cancer Target Delineation Study. Phase II will consist of 2nd set of contours, with corresponding instructions. You will receive notification to the provided email when the next set of contours/instructions are available. In order to receive your honoraria for study completion, both Phase I and Phase II contours and surveys must be completed. Thanks again for your participation in this research effort.

Please submit this completed PDF survey via email to [FLaurie@qarc.org](mailto:FLaurie@qarc.org)

Or
